# Supplementary material for: Systemic changes induced by autologous stem cell ovarian transplant in plasma proteome of women with impaired ovarian reserves
Source: Aging (Albany NY). 2023 Dec 26;15(24):14553–73. doi: 10.18632/aging.205400 (PMC10781467; doi:10.18632/aging.205400)
Supplement: Supplementary Figures [file aging-15-205400-s002.pdf]

## SUPPLEMENTARY FIGURES

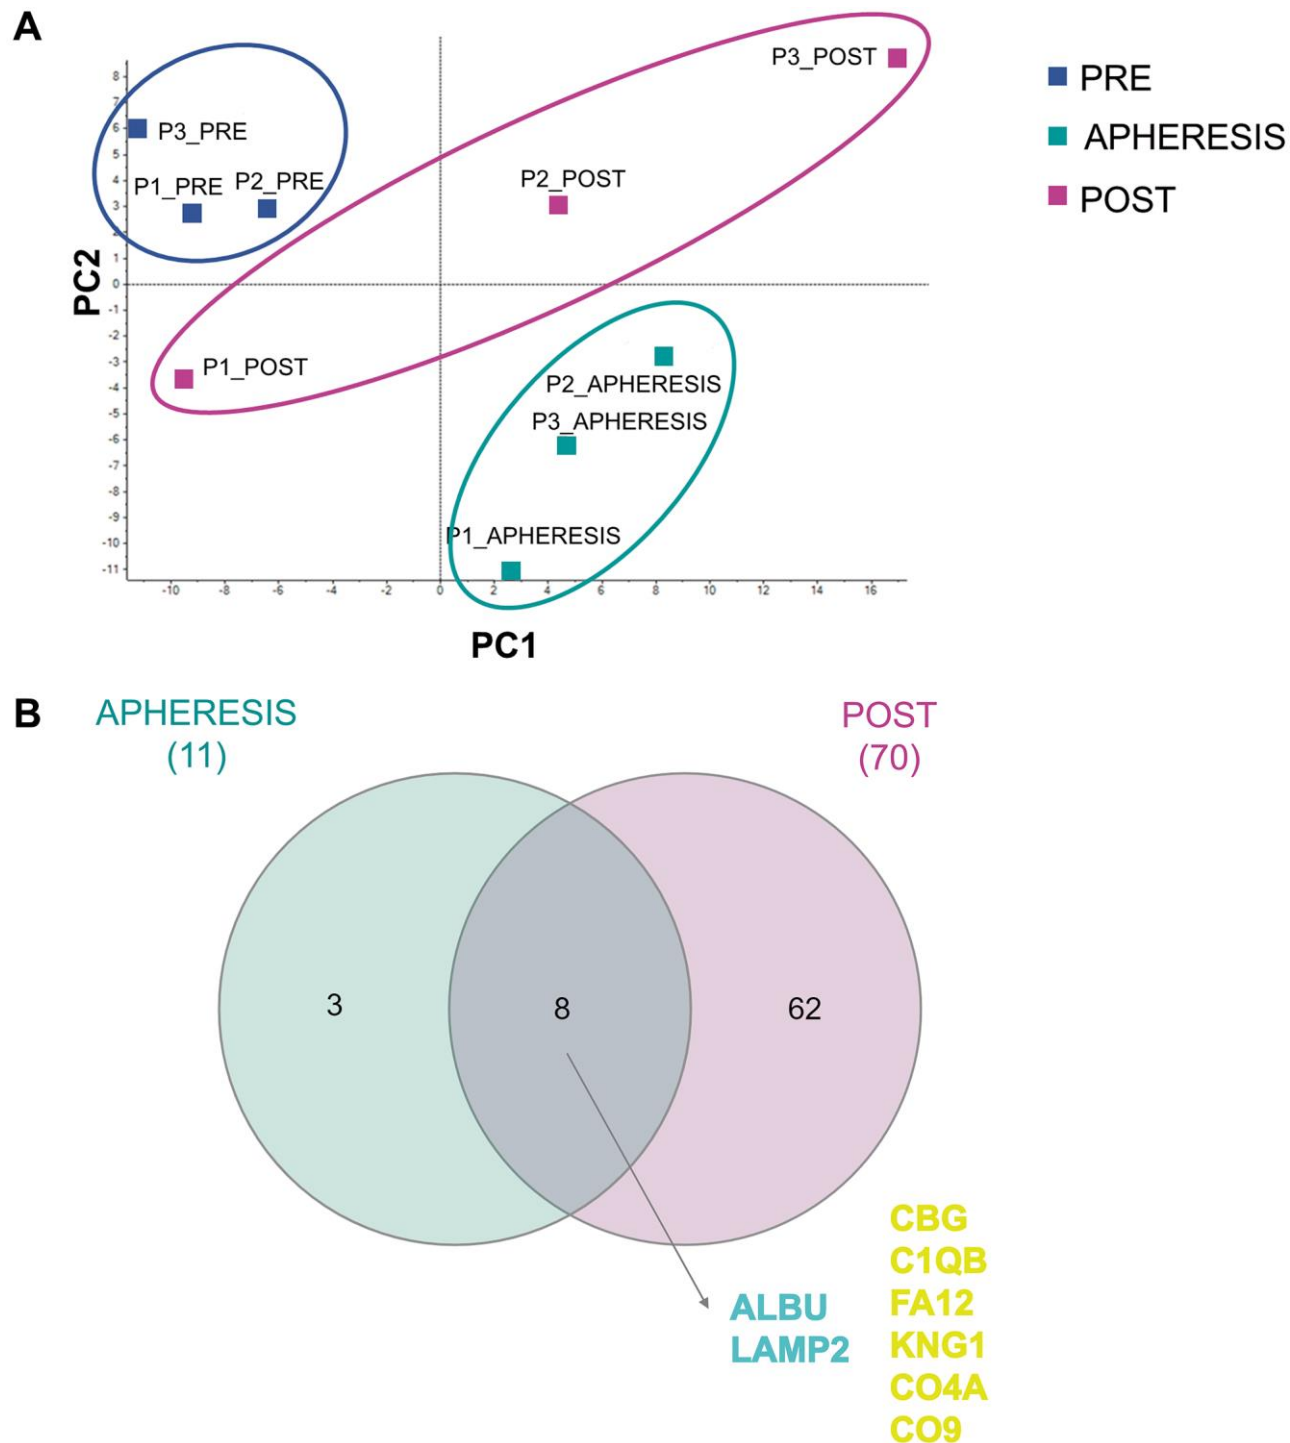

**Supplementary Figure 1. Differences and similarities between immediate and lasting proteomic changes induced by stem cell mobilization and injection in women with poor ovarian response (POR).** (A) Principal component analysis plot considering the expression of the 296 quantified proteins, showing a clear separation between PRE, APHERESIS and POST samples. (B) Venn diagram highlighting the share differentially expressed proteins between APHERESIS vs. PRE and POST vs. PRE comparisons.

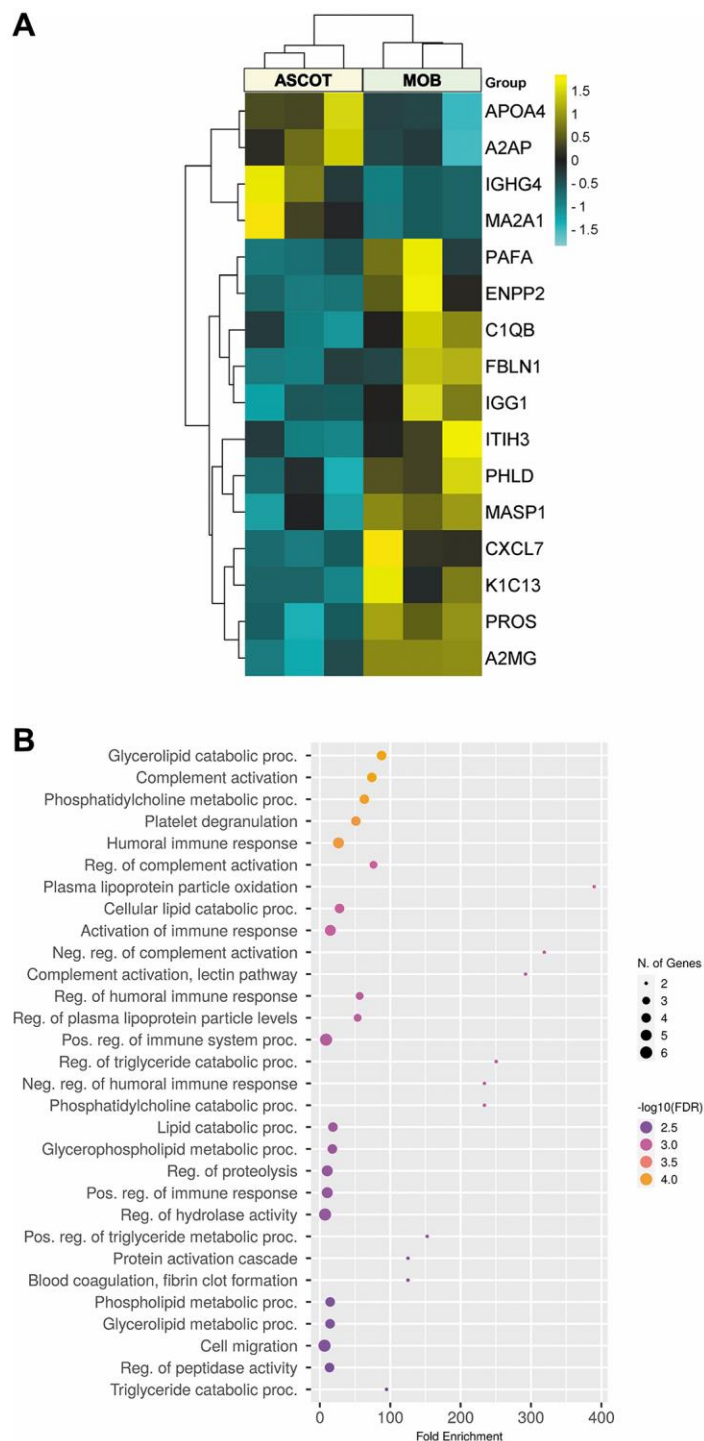

**Supplementary Figure 2. Comparison of the proteomic effects induced by stem cell mobilization, *per se*, and by stem cell injection three months after the procedures in women with premature ovarian insufficiency (POI). (A) Heatmap depicting the hierarchical clustering of the 16 differentially expressed proteins between POST samples of both study arms: mobilization (MOB) and autologous stem cell ovarian transplantation (ASCOT). (B) Dot plot showing the corresponding top 30 significantly enriched (FDR < 0.05) GO biological processes.**
