# Supplementary material for: Systemic changes induced by autologous stem cell ovarian transplant in plasma proteome of women with impaired ovarian reserves
Source: publisher site journal article supplement (doi:10.18632/aging.205400), 2023-12-26
Supplement: Supplementary file [file aging-v15i24-205400-supplementary-material-SD4.pdf]

## SUPPLEMENTARY TABLES

**Supplementary Table 2. Differentially expressed proteins between PRE and APHERESIS samples in women with poor ovarian response (POR).**

| Protein ID | Protein name                                | Protein abbreviation name | Gene name | Estimate |
|------------|---------------------------------------------|---------------------------|-----------|----------|
| P02750     | Leucine-rich alpha-2-glycoprotein           | A2GL                      | LRG1      | 1,771    |
| P01042     | Kininogen-1                                 | KNG1                      | KNG1      | 1,638    |
| P02746     | Complement C1q subcomponent subunit B       | C1QB                      | C1QB      | 1,562    |
| P10909     | Clusterin                                   | CLUS                      | CLU       | 1,299    |
| P02748     | Complement component C9                     | CO9                       | C9        | 1,053    |
| P08185     | Corticosteroid-binding globulin             | CBG                       | SERPINA6  | 0,983    |
| P06727     | Apolipoprotein A-IV                         | APOA4                     | APOA4     | 0,953    |
| P0C0L4     | Complement C4-A                             | CO4A                      | C4A       | 0,727    |
| P00748     | Coagulation factor XII                      | FA12                      | F12       | 0,664    |
| P02768     | Serum albumin                               | ALBU                      | ALB       | -0,414   |
| P13473     | Lysosome-associated membrane glycoprotein 2 | LAMP2                     | LAMP2     | -1,362   |

**Supplementary Table 3. Differentially expressed proteins between POST and APHERESIS samples in women with poor ovarian response (POR).**

| Protein ID | Protein name                                            | Protein abbreviation name | Gene name | Estimate |
|------------|---------------------------------------------------------|---------------------------|-----------|----------|
| Q8TER0     | Sushi, nidogen and EGF-like domain-containing protein 1 | SNED1                     | SNED1     | 2,335    |
| P13796     | Plastin-2                                               | PLSL                      | LCP1      | 2,164    |
| P19320     | Vascular cell adhesion protein 1                        | VCAM1                     | VCAM1     | 2,133    |
| P11597     | Cholesteryl ester transfer protein                      | CETP                      | CETP      | 1,863    |
| P18428     | Lipopolysaccharide-binding protein                      | LBP                       | LBP       | 1,788    |
| P14543     | Nidogen-1                                               | NID1                      | NID1      | 1,709    |
| P08571     | Monocyte differentiation antigen CD14                   | CD14                      | CD14      | 1,647    |
| P02679     | Fibrinogen gamma chain                                  | FIBG                      | FGG       | 1,624    |
| P0DOX8     | Immunoglobulin lambda-1 light chain                     | IGL1                      | IGL1      | 1,624    |
| O00533     | Neural cell adhesion molecule L1-like protein           | NCHL1                     | CHL1      | 1,623    |
| P00751     | Complement factor B                                     | CFAB                      | CFB       | 1,615    |
| P19827     | Inter-alpha-trypsin inhibitor heavy chain H1            | ITIH1                     | ITIH1     | 1,551    |
| P04275     | von Willebrand factor                                   | VWF                       | VWF       | 1,505    |
| P07360     | Complement component C8 gamma chain                     | CO8G                      | C8G       | 1,455    |
| P10643     | Complement component C7                                 | CO7                       | C7        | 1,439    |
| P00488     | Coagulation factor XIII A chain                         | F13A                      | F13A1     | 1,437    |
| P02746     | Complement C1q subcomponent subunit B                   | C1QB                      | C1QB      | 1,404    |
| P12259     | Coagulation factor V                                    | FA5                       | F5        | 1,390    |
| P19823     | Inter-alpha-trypsin inhibitor heavy chain H2            | ITIH2                     | ITIH2     | 1,379    |
| P05546     | Heparin cofactor 2                                      | HEP2                      | SERPIND1  | 1,376    |
| P01011     | Alpha-1-antichymotrypsin                                | AACT                      | SERPINA3  | 1,293    |
| P00748     | Coagulation factor XII                                  | FA12                      | F12       | 1,243    |
| P29622     | Kallistatin                                             | KAIN                      | SERPINA4  | 1,234    |
| P06396     | Gelsolin                                                | GELS                      | GSN       | 1,231    |

|                   |                                                            |       |           |        |
|-------------------|------------------------------------------------------------|-------|-----------|--------|
| <b>P09871</b>     | Complement C1s subcomponent                                | C1S   | C1S       | 1,217  |
| <b>Q12805</b>     | EGF-containing fibulin-like extracellular matrix protein 1 | FBLN3 | EFEMP1    | 1,207  |
| <b>P0C0L4</b>     | Complement C4-A                                            | CO4A  | C4A       | 1,198  |
| <b>P02748</b>     | Complement component C9                                    | CO9   | C9        | 1,186  |
| <b>P05156</b>     | Complement factor I                                        | CFAI  | CFI       | 1,145  |
| <b>P23142</b>     | Fibulin-1                                                  | FBLN1 | FBLN1     | 1,114  |
| <b>P07225</b>     | Vitamin K-dependent protein S                              | PROS  | PROS1     | 1,106  |
| <b>P09211</b>     | Glutathione S-transferase P                                | GSTP1 | GSTP1     | 1,104  |
| <b>P00740</b>     | Coagulation factor IX                                      | FA9   | F9        | 1,098  |
| <b>P15169</b>     | Carboxypeptidase N catalytic chain                         | CBPN  | CPN1      | 1,058  |
| <b>P14151</b>     | L-selectin                                                 | LYAM1 | SELL      | 1,051  |
| <b>P80748</b>     | Immunoglobulin lambda variable 3-21                        | LV321 | IGLV3-21  | 1,015  |
| <b>P02675</b>     | Fibrinogen beta chain                                      | FIBB  | FGB       | 1,002  |
| <b>P05543</b>     | Thyroxine-binding globulin                                 | THBG  | SERPINA7  | 0,990  |
| <b>Q06033</b>     | Inter-alpha-trypsin inhibitor heavy chain H3               | ITIH3 | ITIH3     | 0,971  |
| <b>P36955</b>     | Pigment epithelium-derived factor                          | PEDF  | SERPINF1  | 0,944  |
| <b>Q9BXR6</b>     | Complement factor H-related protein 5                      | FHR5  | CFHR5     | 0,934  |
| <b>P01042</b>     | Kininogen-1                                                | KNG1  | KNG1      | 0,930  |
| <b>P43251</b>     | Biotinidase                                                | BTD   | BTD       | 0,903  |
| <b>P55058</b>     | Phospholipid transfer protein                              | PLTP  | PLTP      | 0,873  |
| <b>P08185</b>     | Corticosteroid-binding globulin                            | CBG   | SERPINA6  | 0,835  |
| <b>Q9UK55</b>     | Protein Z-dependent protease inhibitor                     | ZPI   | SERPINA10 | 0,815  |
| <b>P22792</b>     | Carboxypeptidase N subunit 2                               | CPN2  | CPN2      | 0,794  |
| <b>Q96KN2</b>     | Beta-Ala-His dipeptidase                                   | CNDP1 | CNDP1     | 0,785  |
| <b>Q14624</b>     | Inter-alpha-trypsin inhibitor heavy chain H4               | ITIH4 | ITIH4     | 0,784  |
| <b>Q9P225</b>     | Dynein heavy chain 2, axonemal                             | DYH2  | DNAH2     | 0,755  |
| <b>P05155</b>     | Plasma protease C1 inhibitor                               | IC1   | SERPING1  | 0,751  |
| <b>P01703</b>     | Immunoglobulin lambda variable 1-40                        | LV140 | IGLV1-40  | 0,720  |
| <b>A0A0C4DH38</b> | Immunoglobulin heavy variable 5-51                         | HV551 | IGHV5-51  | 0,719  |
| <b>P01009</b>     | Alpha-1-antitrypsin                                        | A1AT  | SERPINA1  | 0,716  |
| <b>P06276</b>     | Cholinesterase                                             | CHLE  | BCHE      | 0,712  |
| <b>P01008</b>     | Antithrombin-III                                           | ANT3  | SERPINC1  | 0,623  |
| <b>O14791</b>     | Apolipoprotein L1                                          | APOL1 | APOL1     | 0,616  |
| <b>P08697</b>     | Alpha-2-antiplasmin                                        | A2AP  | SERPINF2  | 0,602  |
| <b>Q92820</b>     | Gamma-glutamyl hydrolase                                   | GGH   | GGH       | 0,584  |
| <b>Q9Y6R7</b>     | IgGFc-binding protein                                      | FCGBP | FCGBP     | 0,534  |
| <b>P01624</b>     | Immunoglobulin kappa variable 3-15                         | KV315 | IGKV3-15  | 0,415  |
| <b>P12035</b>     | Keratin, type II cytoskeletal 3                            | K2C3  | KRT3      | -0,383 |
| <b>P02768</b>     | Serum albumin                                              | ALBU  | ALB       | -0,543 |
| <b>P43652</b>     | Afamin                                                     | AFAM  | AFM       | -0,613 |
| <b>P02656</b>     | Apolipoprotein C-III                                       | APOC3 | APOC3     | -0,884 |
| <b>P02774</b>     | Vitamin D-binding protein                                  | VTDB  | GC        | -0,932 |
| <b>Q13103</b>     | Secreted phosphoprotein 24                                 | SPP24 | SPP2      | -0,948 |
| <b>P13473</b>     | Lysosome-associated membrane glycoprotein 2                | LAMP2 | LAMP2     | -1,163 |
| <b>P32119</b>     | Peroxiredoxin-2                                            | PRDX2 | PRDX2     | -2,298 |
| <b>P69905</b>     | Hemoglobin subunit alpha                                   | HBA   | HBA1      | -3,616 |

The most prominent changes after ASCOT, considering the estimated fold change, are highlighted in yellow (upregulations) or blue (downregulations).

**Supplementary Table 4. Ovarian reserve biomarkers of women with premature ovarian insufficiency (POI) before autologous stem cell ovarian transplantation (ASCOT) and three months after this reactivation technique.**

| Parameter    | All (n = 6) |              | ASCOT arm (n = 3) |              | Mobilization arm (n = 3) |              |
|--------------|-------------|--------------|-------------------|--------------|--------------------------|--------------|
|              | PRE         | POST         | PRE               | POST         | PRE                      | POST         |
| AMH (pmol/L) | 0.1 ± 0.1   | 0.3 ± 0.3*   | 0.1 ± 0.0         | 0.4 ± 0.3    | 0.1 ± 0.1                | 0.2 ± 0.1    |
| AFC (n)      | 1.5 ± 1.2   | 2.5 ± 2.6    | 1.3 ± 0.9         | 2.0 ± 2.0    | 1.7 ± 1.5                | 3.0 ± 2.8    |
| FSH (IU/mL)  | 99.9 ± 23.9 | 54.9 ± 35.9* | 100.3 ± 17.3      | 60.2 ± 38.2* | 99.5 ± 31.2              | 49.6 ± 33.6* |

Wilcoxon nonparametric paired test was applied to compare PRE and POST ovarian reserve biomarkers for each patient, indicating the asterisk a *p*-value < 0.05. Abbreviations: AMH: anti-müllerian hormone; AFC: antral follicular count; FSH: follicle-stimulating hormone.

**Supplementary Table 5. Protocols of controlled ovarian stimulation (COS) performed in patients with premature ovarian insufficiency (POI) after autologous stem cell ovarian transplantation (ASCOT) technique.**

| Parameter            | All (n = 6)   | ASCOT arm (n = 3) | Mobilization arm (n = 3) |
|----------------------|---------------|-------------------|--------------------------|
| COS cycles (n total) | 11            | 5                 | 6                        |
| FSH (IU/mL)          | 39.7 ± 16.8   | 38.1 ± 13.4       | 41.0 ± 20.4              |
| AMH (pM)             | 0.4 ± 0.6     | 0.7 ± 0.8         | 0.1 ± 0.1                |
| Days of stimulation  | 8.6 ± 5.8     | 5.4 ± 5.9         | 11.3 ± 4.6               |
| E2 hCG day           | 189.2 ± 182.5 | 276.5 ± 222.2     | 116.3 ± 114.7            |
| AFC total            | 1.6 ± 0.9     | 1.8 ± 1.1         | 1.5 ± 0.8                |
| Punctured follicles  | 0.8 ± 0.4     | 1.0 ± 0.0         | 0.7 ± 0.5                |
| MII oocytes          | 0.3 ± 0.5     | 0.4 ± 0.6         | 0.2 ± 0.4                |
| Embryos              | 0.3 ± 0.5     | 0.3 ± 0.5         | 0.3 ± 0.5                |
| Cancellation         | 2/11 (18.2%)  | 0/5 (0%)          | 2/6 (33.3%)              |

**Supplementary Table 7. Differentially expressed proteins between all PRE and APHERESIS samples in women with premature ovarian insufficiency (POI).**

| Protein ID | Protein name                          | Protein abbreviation name | Gene name | Estimate |
|------------|---------------------------------------|---------------------------|-----------|----------|
| P02745     | Complement C1q subcomponent subunit A | C1QA                      | C1QA      | 2,75     |
| P00736     | Complement C1r subcomponent           | C1R                       | C1R       | 2,70     |
| P14151     | L-selectin                            | LYAM1                     | SELL      | 1,45     |
| P59666     | Neutrophil defensin 3                 | DEF3                      | DEFA3     | 0,81     |
| P00740     | Coagulation factor IX                 | FA9                       | F9        | 0,65     |
| P08571     | Monocyte differentiation antigen CD14 | CD14                      | CD14      | 0,51     |
| P02748     | Complement component C9               | CO9                       | C9        | 0,51     |
| P61626     | Lysozyme C                            | LYSC                      | LYZ       | 0,43     |
| P02747     | Complement C1q subcomponent subunit C | C1QC                      | C1QC      | 0,35     |
| P21333     | Filamin-A                             | FLNA                      | FLNA      | 0,25     |
| P0DOX5     | Immunoglobulin gamma-1 heavy chain    | IGG1                      | 1 SV      | 0,22     |
| P02741     | C-reactive protein                    | CRP                       | CRP       | -0,21    |
| P32754     | 4-hydroxyphenylpyruvate dioxygenase   | HPPD                      | HPD       | -0,28    |
| P11362     | Fibroblast growth factor receptor 1   | FGFR1                     | FGFR1     | -0,43    |

**Supplementary Table 8. Differentially expressed proteins between PRE and POST samples in the mobilization arm.**

| Protein ID | Protein name                                          | Protein abbreviation name | Gene name | Estimate |
|------------|-------------------------------------------------------|---------------------------|-----------|----------|
| P01344     | Insulin-like growth factor II                         | IGF2                      | IGF2      | 0,66     |
| P05109     | Protein S100-A8                                       | S10A8                     | S100A8    | 0,51     |
| Q15582     | Transforming growth factor-beta-induced protein ig-h3 | BGH3                      | TGFBI     | 0,45     |
| P05451     | Lithostathine-1-alpha                                 | REG1A                     | REG1A     | 0,30     |
| Q8IX21     | SMC5-SMC6 complex localization factor protein 2       | SLF2                      | SLF2      | 0,27     |
| P02776     | Platelet factor 4                                     | PLF4                      | PF4       | 0,25     |
| P15924     | Desmoplakin                                           | DESP                      | DSP       | 0,25     |
| P01861     | Immunoglobulin heavy constant gamma 4                 | IGHG4                     | IGHG4     | 0,24     |
| O43866     | CD5 antigen-like                                      | CD5L                      | CD5L      | 0,15     |
| P07996     | Thrombospondin-1                                      | TSP1                      | THBS1     | 0,14     |
| P08253     | 72 kDa type IV collagenase                            | MMP2                      | MMP2      | 0,12     |
| P33908     | Mannosyl-oligosaccharide 1,2-alpha-mannosidase IA     | MA1A1                     | MAN1A1    | 0,12     |
| P00966     | Argininosuccinate synthase                            | ASSY                      | ASS1      | 0,11     |
| P02671     | Fibrinogen alpha chain                                | FIBA                      | FGA       | 0,10     |
| P08709     | Coagulation factor VII                                | FA7                       | F7        | 0,06     |
| P0DML3     | Chorionic somatomammotropin hormone 2                 | CSH2                      | CSH2      | 0,05     |
| P00450     | Ceruloplasmin                                         | CERU                      | CP        | 0,04     |
| P09972     | Fructose-bisphosphate aldolase C                      | ALDOC                     | ALDOC     | 0,02     |
| P11226     | Mannose-binding protein C                             | MBL2                      | MBL2      | -0,01    |
| P11021     | Endoplasmic reticulum chaperone BiP                   | BIP                       | HSPA5     | -0,01    |
| P04003     | C4b-binding protein alpha chain                       | C4BPA                     | C4BPA     | -0,08    |
| Q12860     | Contactin-1                                           | CNTN1                     | CNTN1     | -0,20    |
| O75882     | Attractin                                             | ATRN                      | ATRN      | -0,24    |
| P33151     | Cadherin-5                                            | CADH5                     | CDH5      | -0,54    |

**Supplementary Table 9. Differentially expressed proteins between PRE and POST samples in the ASCOT arm. Table supplied in excel format.**

| Protein ID | Protein name                               | Protein abbreviation name | Gene name | Estimate |
|------------|--------------------------------------------|---------------------------|-----------|----------|
| P61769     | Beta-2-microglobulin                       | B2MG                      | B2M       | 0,35     |
| P01344     | Insulin-like growth factor II              | IGF2                      | IGF2      | 0,23     |
| Q01459     | Di-N-acetylchitobiase                      | DIAC                      | CTBS      | -0,02    |
| P31944     | Caspase-14                                 | CASPE                     | CASP14    | -0,33    |
| Q7Z7G0     | Target of Nesh-SH3                         | TARSH                     | ABI3BP    | -0,35    |
| Q8NE71     | ATP-binding cassette sub-family F member 1 | ABCF1                     | ABCF1     | -0,43    |
| P06396     | Gelsolin                                   | GELS                      | GSN       | -0,49    |
| P43251     | Biotinidase                                | BTD                       | BTD       | -0,50    |
| O00299     | Chloride intracellular channel protein 1   | CLIC1                     | CLIC1     | -0,52    |
| P05160     | Coagulation factor XIII B chain            | F13B                      | F13B      | -0,61    |
| P01031     | Complement C5                              | CO5                       | C5        | -2,97    |

**Supplementary Table 10. Differentially expressed proteins between POST samples of both arms of the study (mobilization and ASCOT). Table supplied in excel format.**

| <b>Protein ID</b> | <b>Protein name</b>                                              | <b>Protein abbreviation name</b> | <b>Gene name</b> | <b>Estimate</b> |
|-------------------|------------------------------------------------------------------|----------------------------------|------------------|-----------------|
| <b>P06727</b>     | Apolipoprotein A-IV                                              | APOA4                            | APOA4            | 0,64            |
| <b>P08697</b>     | Alpha-2-antiplasmin                                              | A2AP                             | SERPINF2         | 0,56            |
| <b>Q16706</b>     | Alpha-mannosidase 2                                              | MA2A1                            | MAN2A1           | 0,49            |
| <b>P01861</b>     | Immunoglobulin heavy constant gamma 4                            | IGHG4                            | IGHG4            | 0,22            |
| <b>P23142</b>     | Fibulin-1                                                        | FBLN1                            | FBLN1            | 0,00            |
| <b>Q13093</b>     | Platelet-activating factor acetylhydrolase                       | PAFA                             | PLA2G7           | -0,39           |
| <b>Q06033</b>     | Inter-alpha-trypsin inhibitor heavy chain H3                     | ITIH3                            | ITIH3            | -0,48           |
| <b>P0DOX5</b>     | Immunoglobulin gamma-1 heavy chain                               | IGG1                             | 1 SV             | -0,65           |
| <b>P02775</b>     | Platelet basic protein                                           | CXCL7                            | PPBP             | -0,66           |
| <b>P13646</b>     | Keratin, type I cytoskeletal 13                                  | K1C13                            | KRT13            | -0,88           |
| <b>P02746</b>     | Complement C1q subcomponent subunit B                            | C1QB                             | C1QB             | -1,04           |
| <b>Q13822</b>     | Ectonucleotide pyrophosphatase/phosphodiesterase family member 2 | ENPP2                            | ENPP2            | -1,69           |
| <b>P07225</b>     | Vitamin K-dependent protein S                                    | PROS                             | PROS1            | -1,95           |
| <b>P01023</b>     | Alpha-2-macroglobulin                                            | A2MG                             | A2M              | -2,11           |
| <b>P80108</b>     | Phosphatidylinositol-glycan-specific phospholipase D             | PHLD                             | GPLD1            | -2,60           |
| <b>P48740</b>     | Mannan-binding lectin serine protease 1                          | MASP1                            | MASP1            | -3,84           |
